# Supplementary material for: Data assimilation and uncertainty assessment in 3D geological modeling
Source: Copernicus journal article supplement (doi:10.5194/se-2016-174), 2017-01-10
Supplement: Supplementary file [file se-2016-174-AC2-supplement.pdf]

## REVISIONS REQUESTED BY THE REVIEWER

**Reviewer: G. Caumon**

guillaume.caumon@ensg.univ-lorraine.fr  
Received and published: 14 March 2017

### Specific comments

**1. The title of the paper is very general and should probably be more specific to better reflect the content. The term “assimilation” is a bit inappropriate, as it is generally used to incorporate data through time in dynamic systems.**

**Reply:**

Title was changed (also recommended by Reviewer #1):

- *“Uncertainty assessment in 3D geological models of increasing complexity”*

**2. Overall, the paper clearly shows that adding data helps globally reducing uncertainty, and confirms that information entropy can be used to quantify this reduction. However, it also clearly shows that uncertainty can locally increase when new data call for making the model more complex, in particular when faults are added. So, if the area of interest were smaller (localized around the inserted faults), or if the averaging were weighted (e.g., with regard to where the ground heave is largest), the total entropy could decrease as new data are considered, which would be counter-intuitive. The fundamental reason, which is mentioned in the paper, is that the initial model, being parsimonious, under-estimates the uncertainty. The message that parsimonious models can locally under-estimate uncertainty, is in my opinion, an important conclusion of this work, which should probably be better stressed.**

**Reply:**

We added a conclusive statement to the “summary and conclusion” section:

- 19/29: *“Furthermore, the method stresses that parsimonious models can locally under-estimate uncertainty, which is only revealed after new data is available and being considered.”*

The statement refers to the following sentences in the discussion section:

- 14/12: *“It can be seen that new hot-spots of uncertainty were introduced in proximity to the faults identified by the exploration boreholes and the seismic data incorporated into Model 4 (c.f., Fig. 7). However, these new areas of uncertainty can be considered an optimization of the model, because large parts of the preceding Model 1 did not reflect the complex local geology. Model 1 (wrongly) predicted low uncertainties for areas where information on unidentified but existing structures (i.e. faults) was missing.”*

**3. It would be useful to indicate all the uncertainty model parameters used in the study: amplitude of geometric perturbation for the various faults and horizons, range of the variograms. Did you change these parameters from model 1 to model 4?**

**Reply:**

Reviewer #1 also recommended adding all uncertainty model parameters. We have added two tables including a description as supplementary material to our article. It was part of the response to the first reviewer, but missing the variogram parameter settings, which have now been complemented (see end of this document).

**4. There are several issues in the mathematical notations: symbols should be the same in the text and in the equations; please also check that all symbols are defined and consistent (math style, upper or lower case) in the text (e.g., geological units are currently denoted by U, u or  $\mathcal{U}$ ; a model is denoted by  $u_i$  in p. 9, l. 24 and by  $i$  on line 9 of p. 10, then  $u_i$  on line 11 denotes a sub-region. I am lost... Indicator functions by  $I_i$  or  $1_i$ ;  $q_i$ ,  $q_j$  on page 9 are not defined (is it the same as  $Q_U$  in Eq (7)?).**

**Reply:**

All symbols were reviewed, checked for consistency in style and meaning and adjusted accordingly. Furthermore, all equations were revised to assure clear communication of meaning.

5. In terms of geology, I am surprised that a reverse fault had to be inserted in Model 3. What is the strike of that fault, and is it supported by the tectonic history of the area? Could it be a normal fault whose dip has been mis-estimated?

**Reply:**

The fault in question is actually a normal fault, wrongly mentioned as a reverse fault in our manuscript. The text was changed as follows to represent the setting of Model 3:

- 11/16: *"By adding the problem specific data from the exploration wells to Model 3, a Horst-Graben structure was identified that entailed a considerable displacement at two normal faults between and to the north-west of the wells with a displacement of 120 m and 70 m, respectively."*

**Technical corrections**

- p. 1, l.17: "high data consistency and superior data visualization": Unclear, please reformulate.

**Reply:**

Reviewer #1 also remarked on this sentence and we reformulated it as follows:

- 1/18: *"3D geological models are usually preferable over 2D solutions, because our object of study is intrinsically three dimensional in space and, therefore, they offer a higher degree of data consistency and superior data visualization."*

- p. 2, l.33: "bur": but? -> was changed accordingly
- p. 4, l. 15: "initiated, because": remove coma. -> was changed accordingly
- p. 5, l. 3: "information that has": that have -> was changed accordingly
- p. 6, l. 6-10: Why did you create explicit models and not directly implicit ones?

**Reply:**

We first created explicit models, because the available input data was, in terms of spatial coverage, not sufficient to directly use an implicit approach. Especially the "non-site specific" data, comprising only sparse information from geological maps, outcrop data, etc. required the flexibility of an explicit approach to create reasonable fault and horizon surfaces for the entire domain. The following sentence has been adapted accordingly:

- 5/21: *"First, an explicit modeling approach (Caumon et al., 2009) was used to create representative boundary surfaces for the geological units and faults of the initial models, because the available input data was, in terms of spatial coverage, not sufficient to directly use an implicit approach."*

- p. 6, l. 11: The implicit method by Lajaunie et al and Calcagno et al follow the same idea as the one in SKUA, but their formulation is different (dual kriging Vs. discrete optimization. A Reference for the method in SKUA is Frank et al. (Computers & Geosciences, 2007).

**Reply:**

We adapted the correct reference for the method in SKUA (Frank et al., 2007) and removed the respective references of the original article in the following sentence:

- 5/27: *"The implicit modeling approach uses a potential field interpolation considering the orientation of strata (Frank et al., 2007), and is based on the U-V-t concept (Mallet, 2004), where horizons represent geochronological surfaces."*

Additional Reference:

- Frank, T., Tertois, A. L., & Mallet, J. L. (2007). 3D-reconstruction of complex geological interfaces from irregularly distributed and noisy point data. *Computers and Geosciences*, 33(7), 932–943.

Removed References:

- Lajaunie, C., Courrioux, G., & Manuel, L. (1997). Foliation fields and 3D cartography in geology: Principles of a method based on potential interpolation. *Mathematical Geology*, 29(4), 571–584.
- Calcagno, P., Chilès, J. P., Courrioux, G., & Guillen, a. (2008). Geological modelling from field data and geological knowledge. Part I. Modelling method coupling 3D potential-field interpolation and geological rules. *Physics of the Earth and Planetary Interiors*, 171(1–4), 147–157.

- p.6, II: Please give the variogram range and value of maximum perturbation applied on the surfaces for the various models. Some discussion about how these values were chosen would also be useful. NB: the maximum displacement and the Gaussian distribution suggest that a truncated Gaussian is used? Please check. References for this method are Tertois et al. (GSL Spec. Publication, 2007); Caumon et al. (EAGE Petroleum Geostatistics, 2007 and Math. Geosci. 2010); Mallet (EAGE book, 2014).

**Reply:**

We included the variogram range, values of maximum perturbation and information on distributions as supplementary material to our article (see end of this document). The following references were added to the manuscript:

- 6/9: *"Fault uncertainties were defined by a maximum displacement parameter and a Gaussian probability distribution around the initial fault surface (Caumon et al., 2007; Tertois and Mallet, 2007)."*

**Additional Reference:**

- Caumon, G., Tertois, A.-L., and Zhang, L.: Elements for Stochastic Structural Perturbation of Stratigraphic models, in: Proceedings of Petroleum Geostatistics, European Association of Geoscientists & Engineers, doi:10.3997/2214-4609.201403041, 2007.
- Tertois, A.-L. and Mallet, J.-L.: Editing Faults within tetrahedral volume models in real time, in: Structurally Complex Reservoirs, edited by Jolley, S. J. and Barr, D. and Walsh, J. J. and Knipe, R. J., vol. 292 of Geol. Society Spec. Publ., 89-101, doi10.1144/sp292.5, 2007.

- p.8, I.11: "U" should have the same font as in Equation (U). Same for all math symbols. -> was changed accordingly
- Eq.(1) "if otherwise": no need for "if". -> was changed accordingly
- Section 3.4: please check mathematical formalism, as the explanations are difficult to follow. Indicating how the distances are computed and their values would also be didactic.

**Reply:**

The mathematical formalism and explanations in Section 3.4 were complete revised. The corresponding equations were re-established and it should now be clear and easier to follow how the two distance measurements and their values are calculated.

- p.11, I.4: "NO-SW" should read NE-SW; Displacement of about 10m for the fault seems small (the cross-section in Fig. 6 suggests about 50 m).

**Reply:**

The modelled displacement in Model 2 was assumed to be 50 m for an ENE-WSW striking, which was not stated correctly in our manuscript. We changed the text accordingly:

- 11/10: *"Information from geological maps and outcrop data revealed a normal fault within the AOI, which was assumed to be ENE-WSW striking with a moderate displacement of about 50 m."*

- p.12, I.4: "direct problem specific data": please remove direct (source of ambiguity, as the term "direct problem" is often used in a completely different sense in geophysical inversion).

**Reply:**

We defined "direct problem specific data" and "indirect problem specific data" in section 3.2 (methods) as our two types of problem specific data. Removing the term "direct" would cause ambiguity within the article itself. Therefore, we would like to keep this term.

- p.12, l.10: This sentence seems to suggest that seismic data are a source of uncertainty. Actually, they aren't, as they do provide information. The uncertainty revealed by seismic sections was present previously, but ignored by interpreters / Modelers who tend to strive for the simplest explanation. Seismic data forces to add complexity down to a certain scale. BTW, it could be useful to explain and discuss a bit more what was done in terms of interpretation and modeling by showing one or two seismic lines.

**Reply:**

We added the following sentences to clarify the role seismic data plays in the data integration process:

- 13/3: *"The information provided by seismic sections revealed uncertainties, which were present previously but not captured by the more simple models 1 to 3. Ultimately, seismic data forces the interpreter to add complexity down to a certain scale."*

The seismic sections were interpreted as part of the seismic campaign conducted by the state geological survey (LGRB). In order to keep the manuscript concise we refrain from adding more information specific to the seismic interpretations or showing seismic lines, however a detailed description can be found in the report by the LGRB (2010). For clarification the following sentence was added to the manuscript:

- 13/7: *"In our case, seismic sections and interpretations were adopted from LGRB (2010)."*

**Reference:**

- LGRB. (2010). Geologische Untersuchungen von Baugrundhebungen im Bereich des Erdwärmesondenfeldes beim Rathaus in der historischen Altstadt von Staufen i. Br. (LGRB, Ed.).

- p.12, l.11: "their connection to fault networks": Unclear to me; please rephrase.

**Reply:**

The sentence was rephrased as follows:

- 13/5: *"However, seismic surveys are inherently ambiguous and allow alternative interpretations, especially concerning the orientation and number of faults as well as the type of fault contact to a fault network (e.g., branching)."*

- p. 12, l. 25: "displacement": perturbation would be more precise (as displacement may also refer to fault slip in the context of 3D structural modeling) -> was changed accordingly

- p. 13, l. 1: Model should read Models -> was changed accordingly

- p.16, l. 8-9: Not sure I understand this sentence.

**Reply:**

The following changes were made for clarification:

- 17/19: *"As previously discussed in section 4.2, our workflow does not explicitly consider uncertainties through dip and strike variations by a value indicated for this purpose, but through perturbations based on alternative surface interpretations, which in our case likely underestimates the fuzziness of the targeted geological units at greater depths."*

- p. 18, l.19-20 "adequate parameters for dip and azimuth": Not sure I understand this point. Could you explain further is this is a software interface problem or a more fundamental issue?

**Reply:**

The SKUA Uncertainty Workflow does not explicitly include an azimuth or dip value that can be entered as a horizon perturbation factor. Therefore, perturbations which represent changes in either one of those two parameters are introduced indirectly through other measures such as alternative surface interpretations. In terms of our modelling approach this means that we can implement uncertainties in azimuth and dip only indirectly through these alternative surfaces but not explicitly by stating a value indicated for this purpose. The sentence was changed as follows:

- 20/4: *"Although it was designed to assess uncertainties in the position and thickness of horizons, uncertainty in orientation could only be included indirectly through perturbations based on alternative surface interpretations, but not by explicit dip and azimuth parameter values indicated for this purpose."*

- p.18, l.24: It would also be appropriate to cite the seminal work of Holden et al (Math Geol., 2003) on stochastic structural modeling.

**Reply:** We added the reference to stochastic structural modeling (Holden et al., 2003) to the following sentence:

- 20/11: *“Future work should therefore aim to include “fault block uncertainties” more effectively into the workflow, for example by including multiple fault network interpretations (Holden et al., 2003; Cherpeau et al., 2010; Cherpeau and Caumon, 2015) or by considering fault zones that produce a given displacement by a variable number of faults.”*

Additional References:

- Holden, L. et al., 2003. Stochastic structural modeling. Mathematical Geology, 35(8), pp.899–914.

- In the conclusion, some more general discussion on the sources of uncertainties could be useful. For example, are the base models 1 to 4 reliable? This study rightfully suggests that Model1 is not reliable in the light of data acquired recently. The correlary is also that Model4 may still be wrong on low data density. Even in high data density areas, isn't there a risk that wrong interpretations have been made? The author's thoughts about these issues would be interesting to read.

**Reply:**

The following sentence was adapted in the summary and conclusion section:

- 19/29: *“Furthermore, our study site (Vorbergzone) is a highly fragmented geological entity, and epistemic uncertainties due to missing information about unidentified but existing geological structures are likely substantial.”*

The following general discussion on data density and wrong interpretations was added to the result section. Some sentences had to be adapted:

- 14/15: *“Model 1 (wrongly) predicted low uncertainties for areas where information on unidentified but existing structures (i.e. faults) was missing. This illustrates that epistemic uncertainties at the study site are likely substantial. Even Model 4 will inevitable still under-represent the true structural complexity at this site, especially in areas of low data density. In a risk-assessment and decision-making process, this can be problematic, because low uncertainty areas might be in fact no-information areas. In such a case, the respective model area would actually be highly uncertain. However, ambiguities in data interpretation (e.g. seismic sections) can lead to incorrectly identified structures and uncertainty in any case, even in areas of high data density.”*

# Uncertainty assessment in 3D geological models of increasing complexity

Daniel Schweizer<sup>1</sup>, Philipp Blum<sup>1</sup>, and Christoph Butscher<sup>1</sup>

<sup>1</sup>Karlsruhe Institute of Technology (KIT), Institute for Applied Geosciences (AGW), Kaiserstr. 12, 76131 Karlsruhe, Germany

*Correspondence to:* Schweizer Daniel (daniel.schweizer@kit.edu)

**Abstract.** The quality of a 3D geological model strongly depends on the type of integrated geological data, their interpretation and associated uncertainties. In order to improve an existing geological model and effectively plan further site investigation, it is of paramount importance to identify existing uncertainties within the model space. Information entropy, a voxel based measure, provides a method for assessing structural uncertainties, comparing multiple model interpretations and tracking changes across consecutively built models. The aim of this study is to evaluate the effect of data ~~assimilation~~ integration (i.e. update of an existing model through successive addition of different types of geological data) on model uncertainty, model geometry and overall structural understanding. Several geological 3D models of increasing complexity, incorporating different input data categories, were built for the study site Staufen (Germany). We applied the concept of information entropy in order to visualize and quantify changes in uncertainty between these models. Furthermore, we propose two measures, the Jaccard and the City-Block distance, to directly compare dissimilarities between the models. The study shows that different types of geological data have disparate effects on model uncertainty and model geometry. The presented approach using both information entropy and distance measures can be a major help in the optimization of 3D geological models.

## 1 Introduction

Three dimensional (3D) geological models have gained importance in structural understanding of the subsurface and are increasingly used as a basis for scientific investigation (e.g., Butscher and Huggenberger, 2007; Caumon et al., 2009; Bistacchi et al., 2013; Liu et al., 2014), natural resource exploration (e.g., Jeannin et al., 2013; Collon et al., 2015; Hassen et al., 2016), decision-making (e.g., Campbell et al., 2010; Panteleit et al., 2013; Hou et al., 2016) and engineering applications (Hack et al., 2006; Kessler et al., 2008). 3D geological models are ~~favorable~~ usually preferable over 2D solutions ~~due to their high~~ , because our object of study is intrinsically three dimensional in space and, therefore, they offer a higher degree of data consistency and superior data visualization. Moreover, they enable the integration of many different types of geological data such as geological maps, cross-sections, outcrops, boreholes as well as data from geophysical (e.g., Boncio et al., 2004) and remote sensing methods (e.g., Schamper et al., 2014). Nevertheless, input data are often sparse, heterogeneously distributed or poorly constrained. In addition, uncertainties from many sources such as measurement error, bias and imprecisions, randomness and lack of knowledge are inherent to all types of geological data (Mann, 1993; Bárdossy and Fodor, 2001; Culshaw, 2005). Furthermore, assumptions and simplifications are made during data collection, and subjective interpretation is part of the

modeling process (Bond, 2015). Hence, model quality strongly depends on the type of integrated geological data and its associated uncertainties.

In order to assess the quality and reliability of a 3D geological model as objectively as possible, it is essential to address underlying uncertainties. Numerous methods have recently been proposed that enable estimates, quantification and visualization of uncertainty (Tacher et al., 2006; Wellmann et al., 2010; Lindsay et al., 2012, 2013, 2014; Lark et al., 2013; Park et al., 2013; Kinkeldey et al., 2015). A promising approach is based on the concept of information entropy (Shannon, 1948). Wellmann and Regenauer-Lieb (2012) applied this concept to 3D geological models. In their study, they evaluated uncertainty as a property of each discrete point of the model domain by quantifying the amount of missing information with regard to the position of a geological unit (Wellmann and Regenauer-Lieb, 2012). They consecutively added new information to a 3D model and compared uncertainties between the resulting models at discrete locations and as an average value for the total model domain using information entropy as a quantitative indicator. Through their approach, they addressed two important questions: 1) How is model quality related to the available geological information and its associated uncertainties; and 2) how is model quality improved through incorporation of new information?

Wellmann and Regenauer-Lieb (2012) illustrated their approach using synthetic 3D geological models, showing how additional geological information affects model uncertainty. The present study goes a step further. It applies the concept of information entropy as well as model dissimilarity to a real case, namely the city of Staufen, Germany at the eastern margin of the Upper Rhine Graben. In contrast to the previous study, the present study evaluates the effects of consecutive addition of data from different data categories to an existing model on model uncertainty and overall model geometry. We hypothesized that disparate effects of different data types on model uncertainty exist, and that quantification of these effects provides a trade-off between costs (i.e. data acquisition) and benefits (i.e. reduced uncertainty and therefore higher model quality). Thus, several 3D geological models of the study site were consecutively built with increasing complexity; each of them based on an increasing amount of (real) categorized data. An approach was developed that uses information entropy and model dissimilarity for quantitative assessment of uncertainty in the consecutive models. Results indicate that the approach is applicable for complex and real geological settings. The approach has large potential as a tool to support both model improvement through ~~data-assimilation~~ successive data integration and cost-benefit analyses of geological site investigations.

## 2 Study site

The city of Staufen suffers from dramatic ground heave that resulted in serious damage to many houses (South-West Germany, Fig. 1). Ground heave with uplift rates exceeding  $10 \text{ mm month}^{-1}$  started in 2007 after seven wells were drilled to install borehole heat exchangers for heating the local city hall (LGRB, 2010). After more and more houses in the historic city center showed large cracks, an exploration program was initiated by the State Geological Survey (LGRB) in order to investigate the case. Results showed that the geothermal wells hydraulically connected anhydrite-bearing clay rocks with a deeper aquifer, and resulting water inflow into the anhydritic clay rock triggered the transformation of the mineral anhydrite into gypsum (Ruch and Wirsing, 2013). This chemical reaction is accompanied by a volume increase that leads to rock swelling, a phenomenon

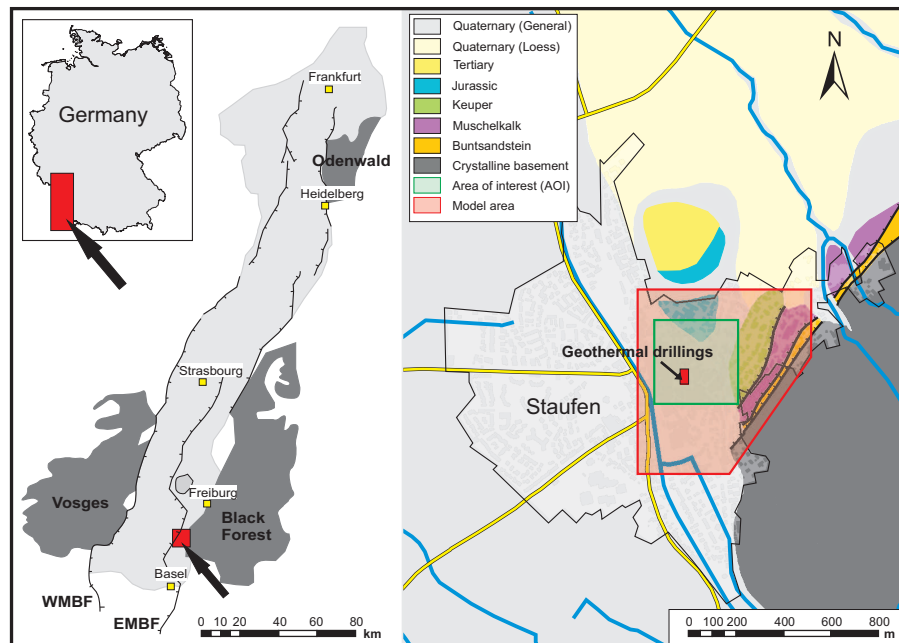

**Figure 1.** Study site and location of the model area and area of interest (AOI).

typically encountered in tunneling in such rock (e.g., Einstein, 1996; Anagnostou et al., 2010; Butscher et al., 2011b, 2015; Alonso, 2012), ~~but~~ recently also observed after geothermal drilling (Butscher et al., 2011a; Grimm et al., 2014). The above mentioned exploration program aimed not only at finding the cause of the ground heave, but also at better constraining the complex local geological setting. The hitherto existing geological data were not sufficient to explain the observed ground heave, locate the geological units that are relevant for rock swelling, and plan counter measures.

Staufen is located west of the Black Forest at the eastern margin of the Upper Rhine Graben (URG). It is part of the “Vorbergzone” (Genser, 1958), a transition zone between the Eastern Main Border Fault (EMBF) of the graben and the graben itself. This zone is characterized by staggered fault blocks that got trapped at the graben margin during opening and subsidence of the graben. The strata of this transition zone are often steeply inclined or even vertical (Schöttle, 2005), and are typically displaced by west-dipping faults with a large normal displacement. The fault system, kinematically linked to the EMBF, has a releasing bend geometry and today experiences sinistral oblique movement (Behrmann et al., 2003). The major geological units at the site comprise Triassic and Jurassic sedimentary rocks, which are covered by Quaternary sediments of an alluvial plain in the south (Sawatzki and Eichhorn, 1999) (Fig. 1).

Three geological units play an important role for the swelling problem at the site: the Triassic Gipskeuper (“Gypsum Keuper”) formation, which contains the swelling zone; and the underlying Lettenkeuper formation and Upper Muschelkalk formation, which are aquifers providing groundwater that accesses the swelling zone via pathways along the BHE. The Gipskeuper formation consists of marlstone and mudstone, and contains the calcium-sulfate minerals anhydrite ( $\text{CaSO}_4$ ) and gypsum ( $\text{CaSO}_4 + \text{H}_2\text{O}$ ). The thickness of this formation varies between 50-165 m, with an average thickness of 100-110 m (LGRB,



2010), depending on the degree of leaching of the sulfate minerals close to the ground surface. It is underlain by the Lettenkeuper formation (5-10 m thickness), consisting of dolomitic limestone, sandstone and mudstone, and the Upper Muschelkalk formation ( $\approx 60$  m thickness) dominantly consisting of limestone and dolomitic limestone.

### 3 Methods

#### 5 3.1 Input data

Input data for the 3D geological modeling include all available geological data that indicate: 1) boundaries between geological units, 2) presence of geological units and faults at a certain positions and 3) orientation (dip and azimuth) of the strata. These data were classified into four categories (Fig. 2): 1) non-site specific, 2) site specific, 3) problem direct specific data and 4) indirect problem specific data.

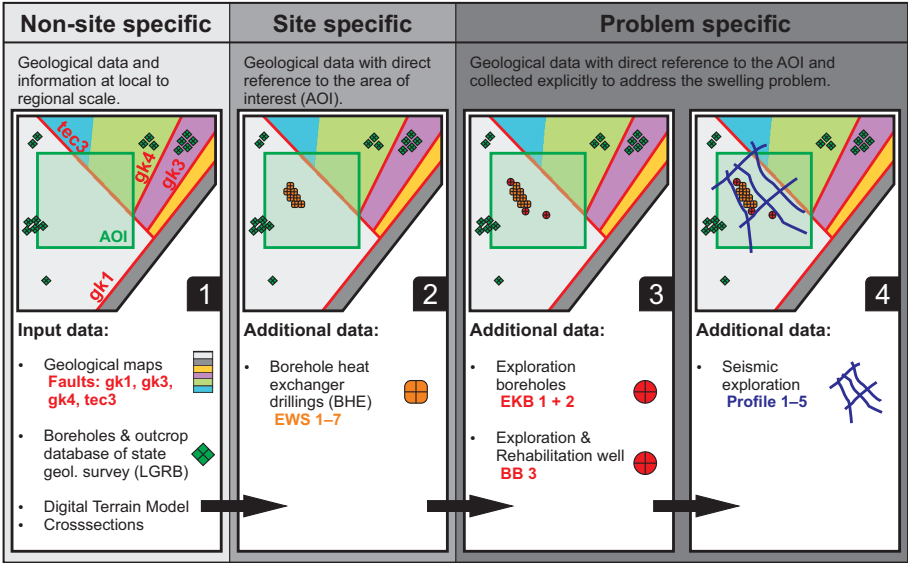

**Figure 2.** Data categories and geological input data used to build four initial 3D geological models. The green square indicates the area of interest (AOI), where data was extracted for further analysis. For geological formation color code see Fig. 1.

10     The non-site specific data category comprise geological data that are generally available from published maps (Sawatzki and Eichhorn, 1999), literature (Genser, 1958; Groschopf et al., 1981; Schreiner, 1991) and the database of state geological survey (LGRB). Furthermore, a Digital Terrain Model (DTM) of 1 m grid size is included in the non-site specific data. Outcrop and borehole data are mostly scarce and irregularly distributed in space. The site specific data comprise drill logs of the geothermal drillings, which provided a pathway for uprising groundwater that finally triggered the swelling. Problem specific

15 data comprise all data collected during the exploration program that was conducted after heave at the ground surface caused damage to the local infrastructure (LGRB, 2010, 2012). This exploration program was initiated ,because geological knowledge

of the site was insufficient for an adequate understanding of the swelling process in the subsurface; and for planning and implementing suitable counter measures. The problem specific data were further divided into direct data from drill cores of the three exploration boreholes (Fig. 2; EKB 1 + 2 and BB 3), which add very accurate point information; and indirect data from a seismic campaign (Fig. 2; Profile 1–5), which add rather “fuzzy” 2D information that ~~has~~have to be interpreted.

## 5 3.2 3D geological modeling

The 3D geological models were constructed using the geomodeling software SKUA/GoCAD® 15.5 by Paradigm. They cover an area of about 0.44 km<sup>2</sup> and have a vertical extent of 665 m. A smaller area of interest (AOI, 300 m × 300 m, 250 m vertical extent) was defined within the model domain, including the drilled wells and the area, where heave at the ground surface was observed and the problem specific data were collected.

10 The strata of the models cover 10 distinct geological units including Quaternary sediments, Triassic and Jurassic bedrock and crystalline basement at the lower model boundary (Fig. 3). The Triassic strata is further divided (from top to bottom) into four formations of the Keuper (Steinmergelkeuper, Schilfsandstein, Gipskeuper and Lettenkeuper), two formations of the Muschelkalk (Upper Muschelkalk, Middle to Lower Muschelkalk) and the Bundsandstein formation. Figure 3 provides an overview over the modeled geological units and average thicknesses used in the initial models.

15 Four initial models were consecutively build, according to the four previously described data categories. Model 1 was constructed based only on non-site specific data (maps, literature, etc.); Model 2 additionally considered site specific data (drill logs of the seven geothermal drillings); Model 3 also included ~~direct~~“direct” problem specific data (exploration boreholes); and finally, Model 4 included ~~indirect~~“indirect” problem specific data (seismic campaign). Through this approach, data density and structural model complexity increase from Model 1 to 4; and the models required successively higher efforts in data acquisition  
20 in the field.

~~For each initial model, First, an explicit modeling approach (Caumon et al., 2009) was used to create~~ representative boundary surfaces ~~between geological units that match the input data were built, using an explicit modeling approach (Caumon et al., 2009).~~  
~~We used the~~ for the geological units and faults of the initial models, because the available input data was, in terms of spatial coverage, not sufficient to directly use an implicit approach. Discrete Smooth Interpolation (DSI) provided by GoCAD® was  
25 used as the interpolation method (Mallet, 1992), which resulted in Delaunay-triangulated surfaces for both horizons and faults. Subsequently, based on the explicitly constructed surfaces, a volumetric 3D model was built by implicit geological modeling, implemented in the software SKUA®. The implicit modeling approach uses a potential field interpolation considering the orientation of strata (~~Lajaunie et al., 1997; Calcagno et al., 2008~~) (Frank et al., 2007), and is based on the U-V-t concept (Mallet, 2004), where horizons represent geochronological surfaces.

## 30 3.3 Uncertainty assessment

### 3.3.1 General approach

Our approach for assessing uncertainties of the 3D geological models consists of four distinct steps (Fig. 4):

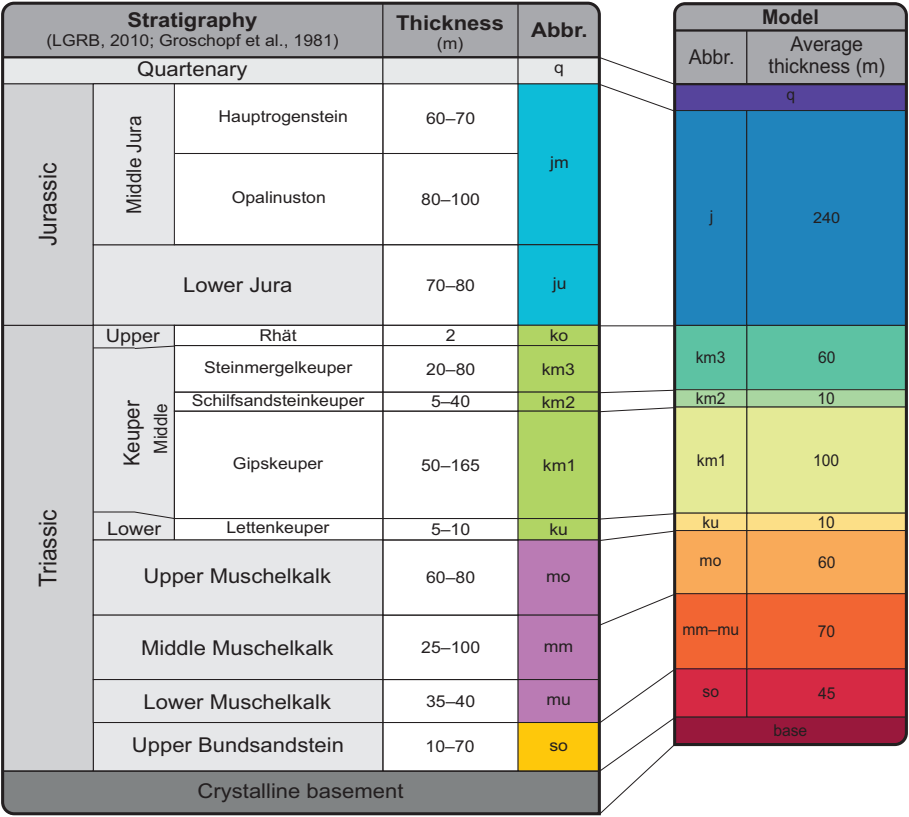

**Figure 3.** Stratigraphic overview of the study area and modeled geological units with average thicknesses.

- (I) Building the initial 3D geological models of increasing data density and structural complexity (see above).
- (II) Definition of fault and horizon uncertainties. Horizon uncertainties were specified in SKUA<sup>®</sup> by a maximum displacement parameter or by alternative surface interpretations, resulting in a symmetric envelope of possible surface locations around the initial surface. ~~Constant displacement values were assigned in order to account for uncertainties in formation thickness and boundary location. Alternative surface interpretations are based on a maximum deviation in dip and azimuth ( $\pm 5^\circ$ ) from the initial surface.~~ To constrain the shape of generated horizons, SKUA<sup>®</sup> uses a variogram that spatially correlates perturbations applied to the initial surfaces (Paradigm, 2015). Fault uncertainties were defined by a maximum displacement parameter and a Gaussian probability distribution around the initial fault surface (Caumon et al., 2007; Tertois and Mallet, 2007) .
- (III) Creation of 30 model realizations for each initial model based on the above defined surface variations, applying the Structure Uncertainty workflow of SKUA<sup>®</sup>.

(IV) Extraction of the geological information from all model realizations for analysis, comparison and visualization. For this purpose, the AOI was divided into a regular 3D grid of 5 m cell size, resulting in 180000 grid cells. The membership of a grid cell to a geological unit was defined as a discrete property of each grid cell and extracted for all 30 model realizations. Based on these data, we calculated the probability of each geological unit being present in a grid cell in order to derive the information entropy at the level of: 1) a single grid cell, 2) a subset representing the area of extent of a geological unit and 3) the overall AOI. Furthermore, the fuzzy set entropy was calculated to determine the ambiguousness of the targeted geological units Gipskeuper (km1), Lettenkeuper (ku) and Upper Muschelkalk (mo) within the AOI. Calculations were conducted using the statistics package R (R Core Team, 2016). The underlying concepts and equations used to calculate probabilities and entropies are described in the following section.

### 3.3.2 Information entropy

The concept of information entropy (or Shannon entropy) was first introduced by Shannon (1948) and is well known in probability theory (Klir, 2005). It quantifies the amount of missing information and hence, the uncertainty at a discrete location  $\underline{x}$ , based on a probability function  $\underline{P}$  of a finite data set. When applied to geological modeling, information entropy expresses the "degree of membership" of a grid cell to a specific geological unit. In other words, information entropy quantitatively describes how unambiguously the available information predicts that unit  $\underline{U}$  is present at location  $\underline{x}$ . Information entropy was recently applied to 3D geological modeling by Wellmann et al. (2010) and Wellmann and Regenauer-Lieb (2012) in order to quantify and visualize uncertainties introduced by imprecision and inaccuracy of geological input data. A detailed description of the method can be found in the cited references, and is briefly summarized here.

By subdividing the model domain  $\underline{M}$  into a regular grid, a discrete property can be assigned to any cell at location  $\underline{x}$  in the model domain. In a geological context, the membership of a grid cell to a geological unit  $\underline{U}$  can be defined as such a property by an indicator function:

$$\underline{I}_U(x) = \begin{cases} 1 & \text{if } x \in U \\ 0 & \text{otherwise} \end{cases} \quad (1)$$

Applied to all ~~n-realizations~~  $\underline{n}$  realizations  $\underline{k}$  of the model space  $\underline{M}$ , the indicator function yields a set of  $\underline{n}$  indicator fields  $\underline{I}$  with each of them defining the membership of a geological unit as a property of a grid cell. Considering the combined information of all indicator fields, it follows that membership is no longer unequivocally defined at a location  $\underline{x}$  and hence has to be expressed by a probability function  $\underline{P}_U$ :

$$\underline{P}_U(\underline{x}) = \sum_{\underline{k} \in \underline{n}} \frac{\underline{I}_{U_k}(x)}{\underline{n}} \quad (2)$$

~~The probability of occurrence  $\underline{P}_U$  for each geological unit of a model domain can be used to obtain~~ From the probabilities of occurrence  $\underline{P}_x(\underline{U})$  the uncertainty (or amount of missing information) associated with a discrete point (grid cell) can be obtained by calculating the information entropy  ~~$\underline{H}$  (Shannon, 1948)~~  $\underline{H}_x$  (Shannon, 1948) for a set of all possible geological

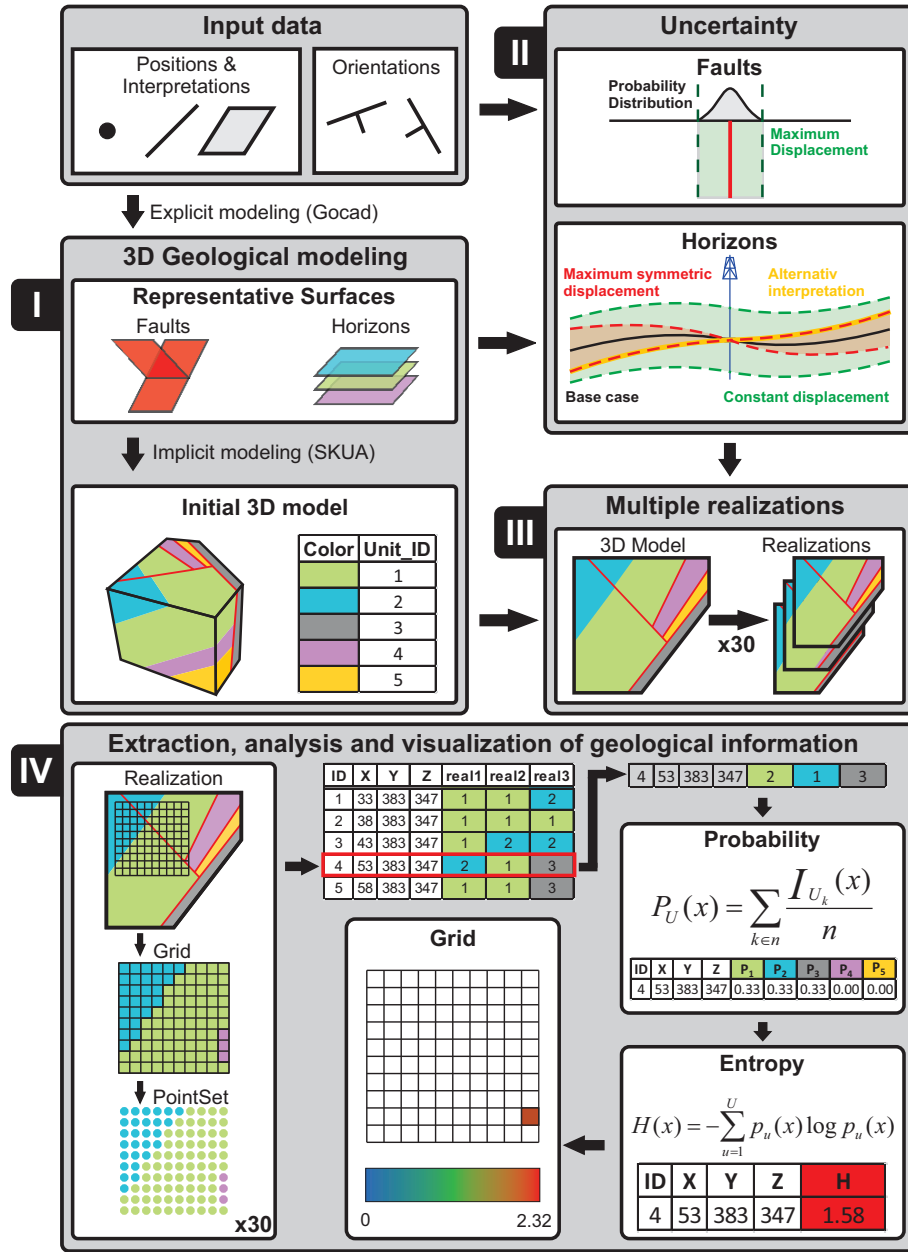

**Figure 4.** Uncertainty assessment workflow with four distinct steps. This workflow is applied to four initial models that are based on the different data sets illustrated in Fig. 2.

units  $\mathcal{U}$ :

$$H(\underline{x})_{\underline{x}} = - \sum_{u=1}^U p_{u \in \mathcal{U}} P_x(\underline{x} \mid \mathcal{U}) \times \log p_{u \in \mathcal{U}} P_x(\underline{x} \mid \mathcal{U}) \quad (3)$$

In a next step, ~~total information entropy~~  $H_T$  ~~information entropy~~  $H_M$  can be calculated as an average value of  $H_x$  over the entire model space:

$$H_{TM} = -\frac{1}{N} \frac{1}{|M|} \times \sum_{x=1}^N \sum_{x \in M} H(x) \quad (4)$$

where  $H_T = 0$   ~~$|M|$  is the number of elements within  $M$~~ ,  $H_M = 0$  denotes that the location of all geological units is precisely known (no uncertainty), and  $H_T - H_M$  is maximum for equally distributed probabilities of the geological units ( $P_1 = P_2 = P_3 = \dots = P_{U1} = P_{U2} = P_{U3} = \dots$ ), which means that a clear distinction between geological units within the model space is not possible.

~~Information~~ Similarly, average information entropy can also be applied to only a subset of the model space ( $S \subseteq M$ ):

$$H_{SubS} = -\frac{1}{N_{Sub}} \frac{1}{|S|} \times \sum_{x=1}^{N_{Sub}} \sum_{x \in S} H(x) \quad (5)$$

$H_{Sub} - H_S$  can be used to evaluate the contribution of a specific sub-domain to overall uncertainty. In case of a drilling campaign, for example, the sub-domain can comprise a targeted depth or a geological formation of specific interest. In this study, we used the probability function  $P_U$  with  $H_{Sub}$  conditioned by  $P_U > 0$   ~~$P_x(U)$  with  $H_S$  conditioned by  $P_x(U) > 0$~~  to define subsets within the model space. Thus, each subset represents the probability space of a geological formation of interest, namely the Lettenkeuper ( $S_{ku}$ ), Gipskeuper ( $S_{km1}$ ) and Upper Muschelkalk ( $S_{mo}$ ) formation.

Wellmann and Regenauer-Lieb (2012) also adapted fuzzy set theory (Zadeh, 1965) in order to assess how well-defined a single geological unit is within a model domain. A fuzzy set of  $n$  model realization introduces a certain degree of indefiniteness to a discrete property (e.g. membership of a geological unit), resulting in imprecise boundaries which can be referred to as fuzziness. The fuzziness of a fuzzy set (De Luca and Termini, 1972) in the context of a geological 3D model can be quantified by the fuzzy set entropy  $H_u - H_U$  (Leung et al., 1992; Yager, 1995):

$$H_{uU} = -\frac{1}{N} \times \sum_{x=1}^N \left[ p_u P_x(xU) \log p_u P_x(xU) + (1 - p_u) (1 - P_x(xU)) \log (1 - p_u) (1 - P_x(xU)) \right] \quad (6)$$

where the probability function  $p_u(x) - P_x(U)$  with an interval  $[0,1]$  represents the degree of membership of a grid cell to a fuzzy set.  $H_u - H_U$  equals 0 when  $p_u - P_x(U)$  is either 0 or 1 everywhere within the set; and  $H_u - H_U$  equals 1 when all cells of the set have an equal probability of  $p_u = 0.5 - P_x(U) = 0.5$ .

### 3.4 Model dissimilarity

The step-wise addition of input data to the models (see section 3.1) not only affects uncertainties associated with a geological unit, but also the geometry of the units, and therefore their position, size and orientation in space. New data may significantly change the geometry of a geological unit but only marginally change the overall uncertainty. Thus, both model uncertainty and dissimilarity should be evaluated. In order to quantify the dissimilarity  $(D) - d$  between consecutive models in terms of the probability of a specific geological unit occurring in a given voxel, two measures, the Jaccard and the

City-block distance (Fig. 5), are proposed to complement information entropy. However, dissimilarities between models and therefore, uncertainties, have recently also been addressed very effectively using geodiversity metrics such as formation depth and volume, curvature and neighborhood relationships together with principal component analysis (Lindsay et al., 2013) and through topological analysis, which quantifies geological relationships in a model Thiele et al. (2016a, b) .

- 5     ~~Given a geological model set  $M$  consisting of  $n$  model realizations, the membership of a grid cell at location  $x$  to a geological unit  $U$  as a subset ( $U \subseteq M$ ). The set of locations for which the probability  $P_x(U)$  of belonging to a particular geological unit  $U$  is greater than a threshold value  $t$  can be defined by an indicator function  $I_U$ , conditioned by the probability  $p_U$ :~~

$$Q_U(x)_M^t = \underline{(p_u > 0)} \{x\}_{P_x(U) > t} \quad (7)$$

- ~~The overlap or similarity in position of a geological unit between two models  $u_i$  and  $u_j$  can then be calculated with the A~~  
 10 ~~threshold value of  $t = 0$  was applied in order to capture and consider the same sample space as in  $H_U$ . This definition is highly sensitive to outcomes of small probability and might, in some cases, be more robust using a threshold value greater then zero (e.g.  $t > 0.05$ ). The Jaccard similarity measure (Webb and Copsey, 2003) ÷~~

$$s_{JAC}(u_i, u_j) = \frac{a}{a + b + c}$$

- ~~where  $a$  defines is then defined as the size of the intersection divided by the size of the union (overlap) between two subregions of identical property, and  $N_{ij} = a + b + c$  their intersection, with:-~~

- ~~$a$ = number of occurrences of  $q_i$  = and  $q_j$  =  $b$ = number of occurrences of  $q_i$  = and  $q_j$  =  $c$ = number of occurrences of  $q_i$  = and  $q_j$  =~~

~~of two sample sets ( $M1, M2$ ), which in our case represent the similarity in position of a geological unit  $U$  between two models;~~

$$25 \quad s_{JAC} = \frac{Q_{M1}^t \cap Q_{M2}^t}{Q_{M1}^t \cup Q_{M2}^t} \quad (8)$$

Accordingly, the dissimilarity between models can be expressed by the Jaccard distance:

$$d_{JAC} = 1 - s_{JAC} \quad (9)$$

where  $d_{JAC} = 1$  indicates maximum dissimilarity (no match ~~between the sub-regions of in position of a geological unit  $U$  between two models~~); and  $d_{JAC} = 0$  indicates complete overlap.

- 25     Even though the use of binary dissimilarities is straight forward and suitable to quantify absolute ~~change changes in position of a geological unit~~ between models, it does not account for fuzziness (c.f., section 3.3.2). Hence, the dissimilarity may be overestimated by the Jaccard distance. In order to include fuzziness, the normalized City-Block distance was employed, adopting the probability function  ~~$P_U$  to compare dissimilarity of a sub-region (geological unit) between two models (i,j)  $P_x(U)$  as a dimension to compare dissimilarities between the two sample sets ( $M1, M2$ )~~ (Webb and Copsey, 2003; Paul and Maji,

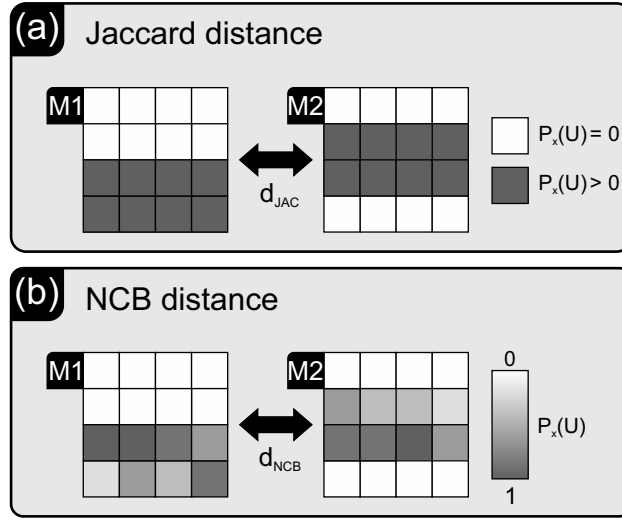

**Figure 5.** Distance measures used to calculate dissimilarities between models (M1, M2). (a) Jaccard distance ( $d_{JAC}$ ) using a TRUE/FALSE binary function and (b) Normalized City-Block distance based on a probability function.

2014):

$$d_{NCB}(\underline{u_i}, \underline{u_j}) = \frac{1}{N} \times \sum_{x=1}^N | \underline{p_i P_x^{M1}(\underline{xU})} - \underline{p_j P_x^{M2}(\underline{xU})} | \quad (10)$$

where ~~N is the combined number of cells in the sub-regions  $u_i$  and  $u_j$~~  N is the size of  $M1 \cup M2$  (i.e., number of grid cells present within the union). The distance is greatest for  $d_{NCB} = 1$ .

## 5 4 Results and discussion

### 4.1 Initial 3D models

The four consecutively constructed initial models show a step-wise increase in structural complexity (Fig. 6). Model 1 was based on non-site specific geological data, and horizon orientations were only constrained by regionally available, isolated outcrop data, which made a general extrapolation of structures difficult, especially into depth (Jessell et al., 2010). Dip and strike were assumed uniform ( $40^\circ$  and  $35^\circ$ ) for all horizons across the model domain (cf., Fig. 6). Information from geological maps and outcrop data revealed a ~~N-S and a NO-SW striking normal fault with moderate displacement ( $\sim 10$  m) within the AOI~~ normal fault within the AOI, which was assumed to be ENE-WSW striking with a moderate displacement of about 50 m.

In Model 2, horizon positions of the Schilfsandsteinkeuper (km2), Gipskeuper (km1) and Lettenkeuper (ku) were locally constrained by site-specific information provided by drill logs of the geothermal wells, slightly impacting fault displacement and thickness of the formations. However, changes in model geometry were minor, as no further information on horizon orientations was available and no additional faults could be located. ~~With addition of~~ By adding the direct problem specific



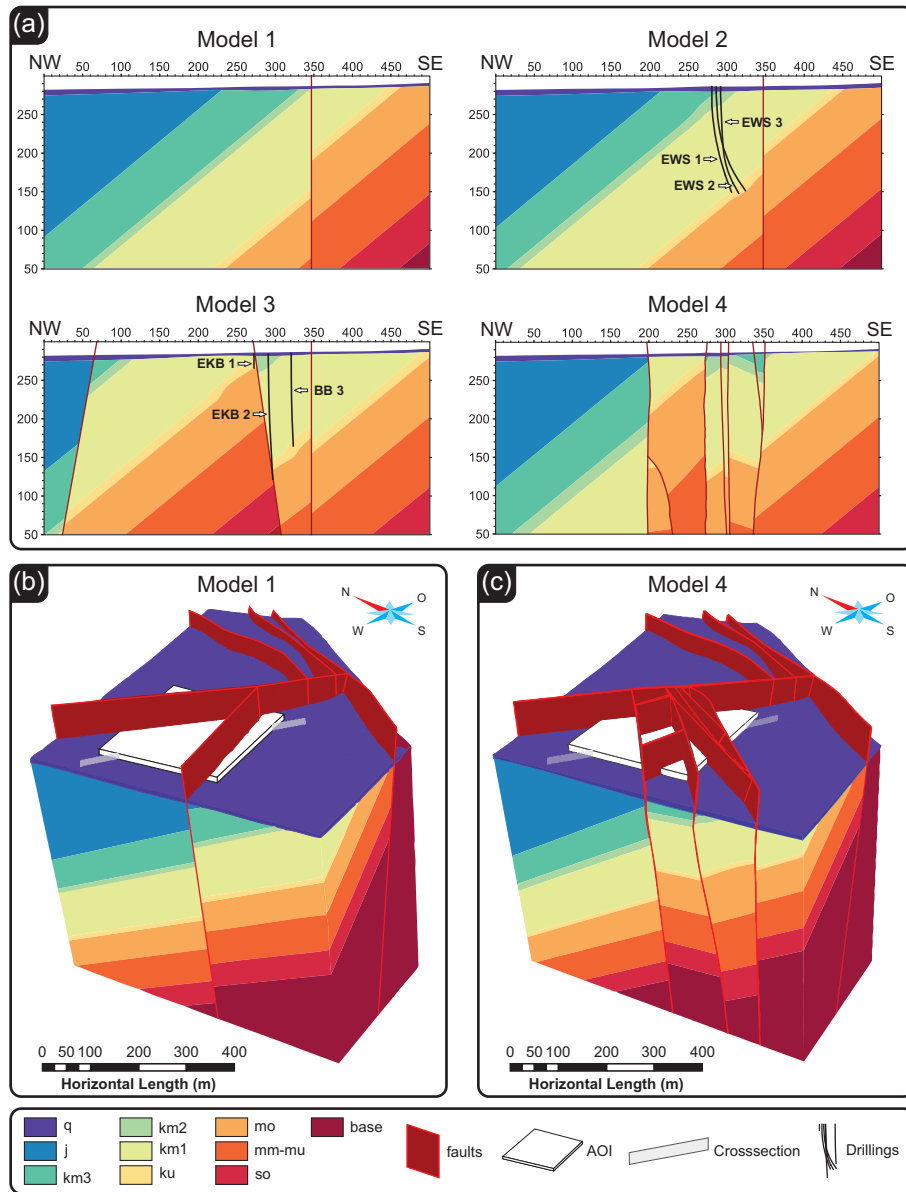

**Figure 6.** (a) Cross-section through the AOI of all four initial geological models with projected borehole tracks (black lines) and 3D representations of (b) Model 1 and (c) Model 4.

data from the exploration wells to Model 3, a Horst-Graben structure was identified that entailed a considerable displacement at a reverse (-m) and a normal fault (two normal faults between and to the north-west of the wells with a displacement of 120 m and 70 m) north-west of the wells, respectively. Furthermore, the drill logs included orientation measurements of the strata, resulting in a shift in position and inclination of layers, compared to the previous models. Thus, large parts of the model

domain within the AOI changed from Model 2 to Model 3 and, as a consequence, dissimilarities between these models are particularly high (cf., section. 4.4). Finally, Model 4, which included data from a seismic campaign, has the highest degree of structural complexity. The information provided by seismic sections revealed uncertainties, which were present previously but not captured by the more simple models 1 to 3. Ultimately, seismic data forces the interpreter to add complexity down to a certain scale. However, seismic surveys are inherently ~~equivocal-ambiguous~~ and allow alternative interpretations, especially concerning the orientation and number of faults as well as ~~their connection to fault networks~~ the type of fault contact to a fault network (e.g., branching) (Røe et al., 2014; Cherpeau and Caumon, 2015; Julio et al., 2015). In our case, ~~the seismic sections and interpretations were adopted from LGRB (2010).~~ The indirect problem specific data from the seismic 2D survey located several additional faults within the AOI, and in some cases caused a shift in position of faults compared to Model 3. The AOI was strongly fragmented by the added faults, and the orientation of layers is no longer uniform but varies strongly between fault blocks. In summary, the step-wise integration of data according to the four data categories improved our general knowledge of subsurface structures at the study site (Fig. 2). In addition, the effect of data integration from different exploration stages on modeled subsurface geometry could be evaluated and visualized.

## 4.2 Multiple model realizations

The multiple (30) model realizations created by the Structural Uncertainty workflow of SKUA are illustrated in Fig. 7 using 2D cross-sections of Model 1 and 4 as examples. A total number of 30 realizations and a cell size of 5 m was chosen as a compromise between model detail, lowest practical limit for statistical viability and data handling. For the same reason we did not base our number of realizations on an estimate of convergence. Instead we used the estimate of 30 realizations for a stable fluctuation in fuzzy entropy in a model developed by Wellmann et al. (2010) as a guideline value to our model. Perturbations in horizon location are based on: 1) alternative surface interpretations, which reflect a maximum deviation in dip and azimuth ( $\pm 5^\circ$ ) from the initial surface and 2) constant displacement values, which were assigned in order to account for uncertainties in formation thickness and boundary location. For a more detailed explanation of our choice of parameters, assigned probability distributions and specific input modes of the Structural Uncertainty workflow, please refer to the supplementary material (Table S1 and S2). In Model 1, the non-site specific data set includes minimal constraints, resulting in faults and horizons of the realizations that are widely dispersed but parallel. In contrast, the faults and horizons of the Model 4 realizations are more narrowly dispersed where problem-specific data was available within the AOI. The workflow handles equal uncertainties consistently across models by producing a similar pattern of horizontal displacement in Model 1 and Model 4. This can be seen in particular for structures located close to the NW boundary, which were not further constrained by consecutively added geological data. However, it is also apparent from the mostly uniform orientation of the surfaces in the 30 realizations of each model that ~~displacement-perturbation~~ measures implemented in the Structural Uncertainty workflow did not allow for large variations in dip and azimuth of horizons or faults. Therefore, uncertainty may be systematically underestimated especially at greater depths.

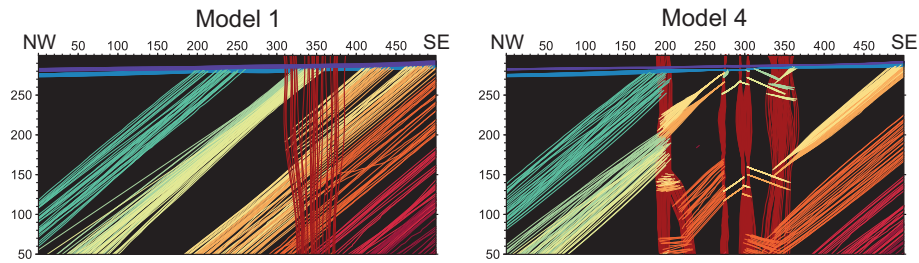

**Figure 7.** Cross-section through Model 1 and Model 4. The multiple lines show 30 model realizations with shifted faults and horizons (for the location of the cross-sections see Fig. 6). The horizontal lines indicate the land surface (purple) and the base of the Quaternary (blue).

### 4.3 Uncertainty assessment

#### 4.3.1 Distribution of information entropy

Information entropy, quantified at the level of individual grid cells, can be visualized in 3D to identify areas of uncertainty and evaluate changes in geometry resulting from ~~data-assimilation~~successive data integration. Figure 8a shows the distribution of information entropy for ~~Model~~Models 1 and 4. It can also be seen that the approach is suitable for locating areas with high degrees of uncertainty, indicated by dark red colors (hot-spots) in this figure. Furthermore, Fig.8b highlights where additional constraints from the data helped to optimize the model by reducing uncertainties ( $\Delta H < 0$   ~~$\Delta H_x < 0$~~ ) and whether further constraints are needed in locations of specific interest.

The overall distribution of uncertainty was clearly affected by additional geological information from site and problem specific input data (Model 4). This effect is highlighted by the changes in entropy between the models (Fig. 8b). Additional constraints on horizon and fault boundaries caused a shift in position and orientation of geological units, followed by a large redistribution of uncertainties, indicated by the changes in entropy. It can be seen that new hot-spots of uncertainty were introduced in proximity to the faults identified by the exploration boreholes and the seismic data incorporated into Model 4 (c.f., Fig. 6). However, these new areas of uncertainty can be considered an optimization of the model, because large parts of the preceding Model 1 did not reflect the complex local geology. Model 1 (wrongly) predicted low uncertainties for areas where information on unidentified but existing structures (i.e. faults) was missing. ~~It is a limitation of the approach that only uncertainty related to existing model structures can be quantified and visualized~~This illustrates that epistemic uncertainties at the study site are likely substantial. Even Model 4 ~~may still underrepresent~~will inevitable still under-represent the true structural complexity at this site, especially in areas of low data density. In a risk-assessment and decision-making process, this can be problematic, because low uncertainty areas might be in fact no-information areas. In such a case, the respective model area would actually be highly uncertain. However, ambiguities in data interpretation (e.g. seismic sections) can lead to incorrectly identified structures and uncertainty in any case, even in areas of high data density. Nevertheless, the approach allows one to assess and visualize uncertainties related to structures that have been identified during site investigation. To lessen the limitations posed by non-sampled locations, Yamamoto et al. (2014) proposed a post-processing method for uncertainty re-

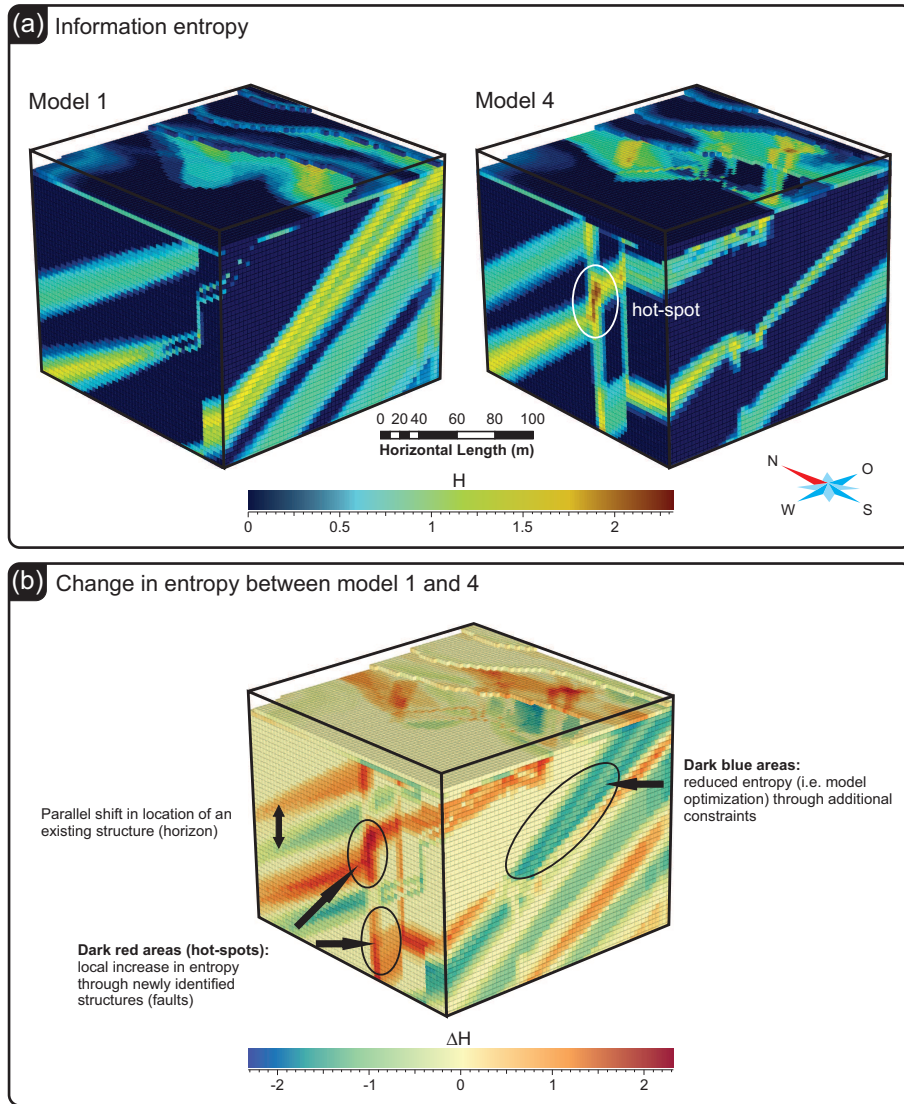

**Figure 8.** 3D view of the AOI with a discretization of 5 m for (a) total-average information entropy  $H-H_M$  of Model 1 and Model 4 and (b) change in entropy  $\Delta H-\Delta H_x$  between both models.

duction, using multiple indicator functions and interpolation variance in addition to information entropy. Based on information theory, Wellmann (2013) further proposed joint entropy, conditional entropy and mutual information as measures to evaluate correlations and reductions of uncertainty in a spatial context. However, uncertainty from lack of evidence for a geological structure (e.g. fault), known as imprecise knowledge (Mann, 1993), still depends on the density and completeness of available

5 input data.

### 4.3.2 ~~Total~~ Average information entropy

The calculated ~~total information entropy~~  $H_T$  average information entropy  $H_M$  of the consecutive models steadily decreases with higher data specificity (i.e. non-site to problem specific, see Fig. 2) from Model 1–4 (Fig. 9). Mean values of  $H_T$ – $H_M$  ranged from 0.56 (Model 1) to 0.39 (Model 4), where  $H_T=0$ – $H_M=0$  would denote no structural uncertainty. The decrease from Model 1 to 4 is approximately linear, indicating that all four categories of geological data had a similar impact on overall model uncertainty, even though the added information resulted in quite different model geometries and, as discussed above, in some cases in a local increase in entropy (cf., Fig. 8b). A similar but more pronounced trend was observed for the ~~total mean entropy~~  $H_{Sub}$  average entropy  $H_S$  of the subsets  $S_{km1}$ ,  $S_{ku}$  and  $S_{mo}$ , which represent the domain of the three geological units that are of particular importance to the swelling problem. However, entropy, i.e. the amount of uncertainty, is considerably higher within the domain of these geological units than for the overall model space, especially for the subsets  $S_{ku}$  and  $S_{mo}$ , identifying them as areas of a particularly high degree of uncertainty. Note that these units are the aquifers that have been hydraulically connected to the swellable rocks via the geothermal drillings. Nevertheless, all entropy values are comparably moderate, considering that a maximum of (only) five different geological units was found in any one grid cell across all four models, yielding a possible maximum entropy of  $H_T=2.32$ – $H_M=2.32$  for an equal probability distribution ( $P_1 = P_2 = P_3 = P_4 = P_5$ ). For comparison: if all ten geological units would be equally probable, the maximum entropy would be 3.32. Furthermore, median values and interquartile range dropped from 0.51 (0–0.99) in Model 1 to 0 (0–0.84) in Model 4. This helps to illustrate that the amount of grid cells with  $H_T=0$ – $H_M=0$  (indicating no inherent uncertainty), increased notably by 34.8 % from 40.6 % (Model 1) to 54.8 % (Model 4); and that the remaining entropies in Model 4 are limited to a considerably smaller number of cells within the model domain.

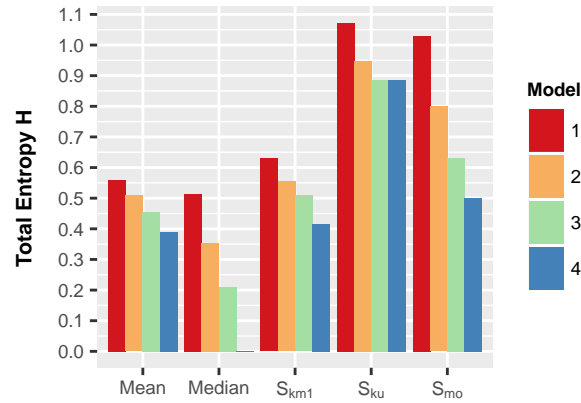

**Figure 9.** ~~Total~~ Average entropy  $H$ – $H_M$  calculated for the different models (mean and median) and for subsets of the model space of each model ( $S_{km1}$ ,  $S_{ku}$ ,  $S_{mo}$ ).

Overall, comparing the pre- to post-site-investigation situations (Model 1–4), site and problem specific investigations were all equally successful in adding information to the model and reducing uncertainties in the area of the targeted horizons. While the benefits from the different data are equal, the costs in data acquisition (i.e. work, money and time required) may vary considerably, depending on the exploration method (e.g., drillings, seismic survey, etc.). An economic evaluation was not within the scope of this study. Nevertheless, the approach presented could improve cost and benefit analyses by quantifying the gain in information through different exploration stages.

### 4.3.3 Fuzzy set entropy

The fuzzy set entropy was calculated to indicate how well-defined a geological unit is within the model space. Applied to the swelling problem of our case study, a high degree of uncertainty remains with regard to the position of the relevant geological units (km1, ku, mo) after ~~data assimilation~~ full data integration. We obtained fuzzy set entropy values ( $H_U$ ) ranging between 0.329–0.504 (Fig. 10). The fuzziness of these geological units only slightly changed from Model 1 to Model 4, indicating that higher data specificity did not translate into more clearly defined geological units within the model domain. This can be partially attributed to the complex geological setting of the study site. In the process of ~~data assimilation~~ integration, additional boundaries between geological units are created at newly introduced faults, increasing the overall fuzziness of a unit.

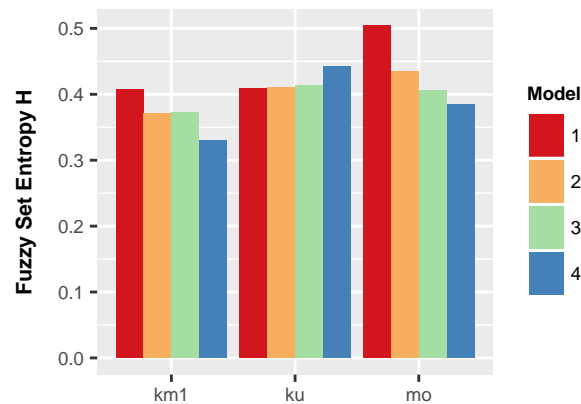

**Figure 10.** Fuzzy set entropy  $H_U$  of the targeted geological units km1, ku and mo of the different models.

In case of the Lettenkeuper formation (unit ku), boundaries are even slightly less well-defined in Model 4 compared to Model 1. This is likely related to the low thickness of the formation (5–10 m, Fig. 3) relative to the mesh size (5 m). A finer grid could reduce this effect; however computation time would increase significantly. Wellmann and Regenauer-Lieb (2012) propose using unit fuzziness to determine an optimal representative cell size and reduce the impact of spatial discretization on information entropy. As previously discussed in section 4.2, our workflow does not explicitly consider uncertainties through dip and strike variations ~~;~~ which by a value indicated for this purpose, but through perturbations based on alternative surface

interpretations, which in our case likely underestimates the fuzziness of the targeted geological units at greater depths. Thus, overall fuzziness, particularly in Model 1, may be significantly higher than calculated.

#### 4.4 Models dissimilarity

A gain in structural information through newly acquired data usually not only impacts model uncertainty but is also associated with a change in model geometry. The calculated distances between models can identify the data category with the strongest impact on model geometry and make it possible to determine whether model geometry and uncertainty are related. Figure 11 shows the calculated Jaccard and City-Block distances between the models with respect to the targeted geological units km1, ku and mo.

Calculated distances between models are rather high, with values of up to 0.78; indicating a pronounced shift in position of the geological units after data was added. The addition of both direct and indirect problem specific data to Model 3 had a strong impact on model geometry, which can be seen by comparing the calculated distances between Model 2, 3 and 4 for both, Jaccard and City-Block (Fig. 11). In contrast, site specific data had a much lower effect, with less than 20 % (0.2) change in unit position, except for ku of the Jaccard distance (see distance between Model 1 and 2).

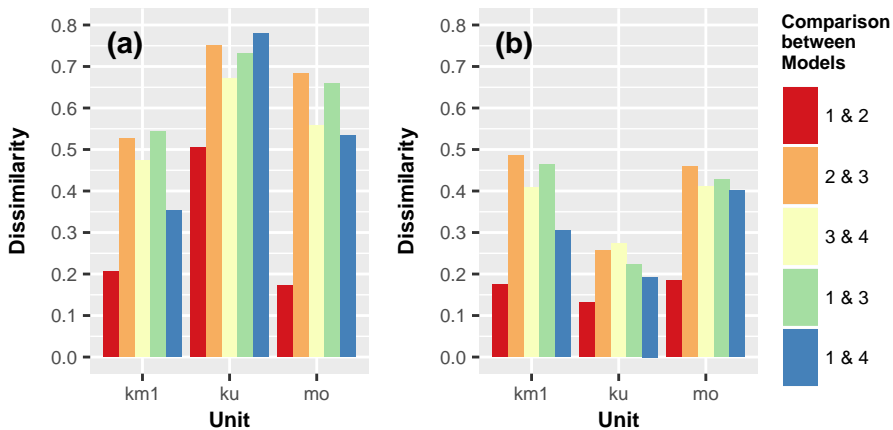

**Figure 11.** Dissimilarities between the different models expressed by (a) Jaccard distance, and (b) City-Block distance.

Overall, the City-Block distance, which considers the fuzziness of geological boundaries, shows a similar trend as the Jaccard distance; however changes are much less pronounced, especially for unit ku. According to the low City-Block distance, absolute changes in probability  $P_U - P_x(U)$  for each grid cell are small, whereas high Jaccard distances indicate a large number of grid cells being affected through newly added data. Thus, the Jaccard distance likely overestimated the actual dissimilarity between models. Comparing unit ku of both distances; the disparity between values hints at a large number of low degree changes in membership of the grid cells ( $\Delta P \ll 1$   $\Delta P_x(U) \ll 1$ ). These predominately low degree changes are likely related to the above mentioned high degree of unit boundary fuzziness; and the resulting, ill defined, geological unit ku being shifted within



the model domain. However, a direct comparison of fuzzy set entropy to the corresponding City-Block distance yields no quantifiable relationship between model geometry and structural uncertainty.

Nonetheless, both distance measures allow quantification and assessment of different aspects of dissimilarities and therefore, changes in geometry across models. Yet, the City-Block distance is preferable when sets of multiple realizations are compared, because it factors in the probability of occurrence of a geological unit at a discrete location. In recent years, various distance measures have already been applied in ~~a similar fashion~~ other contexts to create dissimilarity distance matrices and compare model realizations in history matching and uncertainty analysis, particularly in reservoir modeling (Suzuki et al., 2008; Scheidt and Caers, 2009a, b; Park et al., 2013). These include the Hausdorff distance which, similar to our approach, directly compares the geometry of different structural model realizations, but also more sophisticated measures that calculate distances in realizations based on flow model responses from a transfer function.

## 5 Summary and conclusions

Prior work has demonstrated the effectiveness of information entropy in assessing model uncertainties and providing valuable insight into the geological information used to constrain a 3D model. Wellmann and Regenauer-Lieb (2012), for example, evaluated how additional information reduces uncertainty and helps to constrain and optimize a geological model using the measure of information entropy. Their approach focused on a hypothetical scenario of newly added borehole data and cross-section information to a synthetic model. In the present study, information entropy and, in addition, model dissimilarity was used to assess the impact of newly acquired data on model uncertainties using actual site investigation data in the complex geological setting of a real case.

We presented a new workflow and methods to describe the effect of data ~~assimilation~~ integration on model quality, overall structural understanding of the subsurface and model geometry. Our results provide a better understanding of how model quality can be assessed in terms of uncertainties in a data acquisition process of an exploration campaign, showing that information entropy and model dissimilarity are powerful tools to visualize and quantify uncertainties, even in complex geological settings. The main conclusions of this study are:

- (1) ~~Total~~ Average and fuzzy set entropy can be used to evaluate uncertainties in 3D geological modeling and, therefore, support model improvement during a consecutive data ~~assimilation~~ integration process. We suggest that the approach could be used to also perform a cost-benefit analysis of exploration campaigns.
- (2) The study confirms that 3D visualization of information entropy can reveal hot-spots and changes in distribution of uncertainty through newly added data in real cases. The method provides insight into how additional data reduce uncertainties in some areas, and how newly identified geological structures may create hot-spots of uncertainty in others. Furthermore, the method stresses that parsimonious models can locally under-estimate uncertainty, which is only revealed after new data is available and being considered.



(3) Dissimilarities in model geometry across different sets of model realizations can effectively be quantified and evaluated by a single value using the City-Block distance. A combination of the concepts of information entropy and model dissimilarity improves uncertainty assessment in 3D geological modeling.

However, some limitations of the presented approach are noteworthy. Although it was designed to assess uncertainties in the position and thickness of horizons, ~~uncertainties-uncertainty~~ in orientation could only be included indirectly ~~with adequate parameters for~~ through perturbations based on alternative surface interpretations, but not by explicit dip and azimuth parameter values indicated for this purpose. This may result in a systematic underestimation of uncertainties at greater depths of the model domain. Furthermore, our study site (Vorbergzone) is a highly fragmented geological entity, and epistemic uncertainties due to missing information about unidentified but existing geological structures ~~may also be underestimated with our approach~~ are likely substantial.

Future work should therefore aim to include “fault block uncertainties” more effectively into the workflow, for example by including multiple fault network interpretations ~~(Cherpeau et al., 2010; Cherpeau and Caumon, 2015)~~ (Holden et al., 2003; Cherpeau et al., 2015) by considering fault zones that produce a given displacement by a variable number of faults. Finally, all data of the investigated site was collected prior to our analysis; therefore additional data was not explicitly collected in order to reduce detected uncertainties within the consecutive models. Applying this approach during an ongoing site investigation could improve the targeted exploration and allow a well-founded cost-benefit analysis through uncertainty hot-spot detection.

## 6 Data availability

The underlying research data was collected and provided by the state geological survey (LGRB). It is freely available in the form of two extensive reports (LGRB, 2010, 2012) summarizing the findings of the exploration campaigns conducted in the city of Staufen (Germany). Both reports can be downloaded from <http://www.lgrb-bw.de/geothermie/staufen>. Since the size of the simulation datasets is too large for an upload, the authors encourage interested readers to contact the co-authors.

*Author contributions.* D. Schweizer, C. Butscher and P. Blum designed the study and developed the methodology. D. Schweizer performed the 3D geological modeling, implemented the approach for uncertainty assessment and analyzed the results. D. Schweizer prepared the manuscript with contributions from all co-authors.

*Competing interests.* The authors declare that they have no conflict of interest.

*Acknowledgements.* The financial support for D. Schweizer from the German Research Foundation (DFG) under grant number BU 2993/2-1 is gratefully acknowledged. Furthermore, we thank the Geological Survey of Baden-Württemberg (LGRB), especially Dr. Gunther Wirsing and Dr. Clemens Ruch (LGRB) for data provision; and the Paradigm support team for their technical support. Finally, we would like to thank

Prof. Dr. Jan Behrmann (GEOMAR) and Prof. Dr. Thomas Bohlen (KIT) for discussions of the tectonic setting and seismic interpretations, respectively.

## References

- Alonso, E.: Crystal growth and geotechnics, in: Riv. Ital. di Geotech., p. 13, 2012.
- Anagnostou, G., Pimentel, E., and Serafeimidis, K.: Swelling of sulphatic claystones - some fundamental questions and their practical relevance, *Geomech. Tunn.*, 3, 567–572, doi:10.1002/geot.201000033, <http://doi.wiley.com/10.1002/geot.201000033>, 2010.
- 5 Bárdossy, G. and Fodor, J.: Traditional and New Ways to Handle Uncertainty in Geology, *Nat. Resour. Res.*, 10, 179–187, doi:10.1023/A:1012513107364, 2001.
- Behrmann, J. H., Hermann, O., Horstmann, M., Tanner, D. C., and Bertrand, G.: Anatomy and kinematics of oblique continental rifting revealed: A three-dimensional case study of the southeast Upper Rhine graben (Germany), *Am. Assoc. Pet. Geol. Bull.*, 87, 1105–1121, doi:10.1306/02180300153, 2003.
- 10 Bistacchi, A., Massironi, M., Superchi, L., Zorzi, L., Francese, R., Giorgi, M., Chistolini, F., and Genevois, R.: A 3D Geological Model of the 1963 Vajont Landslide, *Ital. J. Eng. Geol. Environ.*, 2013, 531–539, doi:10.4408/IJEGE.2013-06.B-51, 2013.
- Boncio, P., Lavecchia, G., and Pace, B.: Defining a model of 3D seismogenic sources for Seismic Hazard Assessment applications: The case of central Apennines (Italy), *J. Seismol.*, 8, 407–425, doi:10.1023/B:JOSE.0000038449.78801.05, 2004.
- Bond, C. E.: Uncertainty in structural interpretation: Lessons to be learnt, *J. Struct. Geol.*, 74, 185–200, doi:10.1016/j.jsg.2015.03.003, <http://www.sciencedirect.com/science/article/pii/S0191814115000607>, 2015.
- 15 Butscher, C. and Huggenberger, P.: Implications for karst hydrology from 3D geological modeling using the aquifer base gradient approach, *J. Hydrol.*, 342, 184–198, doi:10.1016/j.jhydrol.2007.05.025, <http://linkinghub.elsevier.com/retrieve/pii/S0022169407003204>, 2007.
- Butscher, C., Huggenberger, P., Auckenthaler, A., and Bänninger, D.: Risikoorientierte Bewilligung von Erdwärmesonden, *Grundwasser*, 16, 13–24, doi:10.1007/s00767-010-0154-5, <http://link.springer.com/10.1007/s00767-010-0154-5>, 2011a.
- 20 Butscher, C., Huggenberger, P., Zechner, E., and Einstein, H. H.: Relation between hydrogeological setting and swelling potential of clay-sulfate rocks in tunneling, *Eng. Geol.*, 122, 204–214, doi:10.1016/j.enggeo.2011.05.009, <http://linkinghub.elsevier.com/retrieve/pii/S0013795211001475>, 2011b.
- Butscher, C., Mutschler, T., and Blum, P.: Swelling of Clay-Sulfate Rocks: A Review of Processes and Controls, *Rock Mech. Rock Eng.*, doi:10.1007/s00603-015-0827-6, <http://link.springer.com/10.1007/s00603-015-0827-6>, 2015.
- 25 Calcagno, P., Chilès, J. P., Courrioux, G., and Guillen, a.: Geological modelling from field data and geological knowledge. Part I. Modelling method coupling 3D potential-field interpolation and geological rules, *Phys. Earth Planet. Inter.*, 171, 147–157, doi:10.1016/j.pepi.2008.06.013, 2008.
- Campbell, S. D. G., Merritt, J. E., Dochartaigh, B. E. O., Mansour, M., Hughes, A. G., Fordyce, F. M., Entwisle, D. C., Monaghan, A. A., and Loughlin, S. C.: 3D geological models and their hydrogeological applications: supporting urban development a case study in Glasgow-Clyde, UK, *Zeitschrift der Deutschen Gesellschaft für Geowissenschaften*, 161, 251–262, 2010.
- 30 Caumon, G., Tertois, A.-L., and Zhang, L.: Elements for Stochastic Structural Perturbation of Stratigraphic models, in: *Proceedings of Petroleum Geostatistics, European Association of Geoscientists & Engineers*, doi:10.3997/2214-4609.201403041, 2007.
- Caumon, G., Collon-Drouaillet, P., Le Carlier de Veslud, C., Viseur, S., and Sausse, J.: Surface-Based 3D Modeling of Geological Structures, *Math. Geosci.*, 41, 927–945, doi:10.1007/s11004-009-9244-2, <http://link.springer.com/10.1007/s11004-009-9244-2>, 2009.
- 35 Cherpeau, N. and Caumon, G.: Stochastic structural modelling in sparse data situations, *Pet. Geosci.*, 21, 233–247, doi:10.1144/petgeo2013-030, <http://pg.lyellcollection.org/lookup/doi/10.1144/petgeo2013-030>, 2015.

- Cherpeau, N., Caumon, G., and Lévy, B.: Stochastic simulations of fault networks in 3D structural modeling, *Comptes Rendus Geosci.*, 342, 687–694, doi:10.1016/j.crte.2010.04.008, 2010.
- Collon, P., Steckiewicz-Laurent, W., Pellerin, J., Laurent, G., Caumon, G., Reichart, G., and Vaute, L.: 3D geomodelling combining implicit surfaces and Voronoi-based remeshing: A case study in the Lorraine Coal Basin (France), *Comput. Geosci.*, 77, 29–43, doi:10.1016/j.cageo.2015.01.009, <http://linkinghub.elsevier.com/retrieve/pii/S0098300415000102>, 2015.
- Culshaw, M.: From concept towards reality: developing the attributed 3D geological model of the shallow subsurface, *Q. J. Eng. Geol. Hydrogeol.*, 38, 231–284, doi:10.1144/1470-9236/04-072, <http://qjgeh.lyellcollection.org/cgi/doi/10.1144/1470-9236/04-072>, 2005.
- De Luca, A. and Termini, S.: A definition of a nonprobabilistic entropy in the setting of fuzzy sets theory, *Inf. Control*, 20, 301–312, doi:10.1016/S0019-9958(72)90199-4, 1972.
- 10 Einstein, H.: Tunnelling in difficult ground—swelling behaviour and identification of swelling rocks, *Rock Mech. rock Eng.*, 29, 113–124, <http://link.springer.com/article/10.1007/BF01032649>, 1996.
- Frank, T., Tertois, A. L., and Mallet, J. L.: 3D-reconstruction of complex geological interfaces from irregularly distributed and noisy point data, *Comput. Geosci.*, 33, 932–943, doi:10.1016/j.cageo.2006.11.014, 2007.
- Genser, H.: *Geologie der Vorbergzone am südwestlichen Schwarzwaldrand zwischen Staufen und Badenweiler*, 1958.
- 15 Grimm, M., Stober, I., Kohl, T., and Blum, P.: Schadensfallanalyse von Erdwärmesondenbohrungen in Baden-Württemberg, *Grundwasser*, 19, 275–286, doi:10.1007/s00767-014-0269-1, 2014.
- Groschopf, R., Guntram, K., Leiber, J., Maus, H., Ohmert, W., Schreiner, A., and Wimmenauer, W., eds.: *Erläuterung zur Geologischen Karte von Freiburg im Breisgau und Umgebung 1:25000*, Geologisches Landesamt Baden-Württemberg, Stuttgart, 2. edn., 1981.
- Hack, R., Orlic, B., Ozmutlu, S., Zhu, S., and Rengers, N.: Three and more dimensional modelling in geo-engineering, *Bull. Eng. Geol. Environ.*, 65, 143–153, doi:10.1007/s10064-005-0021-2, 2006.
- 20 Hassen, I., Gibson, H., Hamzaoui-Azaza, F., Negro, F., Rachid, K., and Bouhlila, R.: 3D geological modeling of the Kasserine Aquifer System, Central Tunisia: New insights into aquifer-geometry and interconnections for a better assessment of groundwater resources, *J. Hydrol.*, 539, 223–236, doi:10.1016/j.jhydrol.2016.05.034, <http://linkinghub.elsevier.com/retrieve/pii/S0022169416303018>, 2016.
- Holden, L., Mostad, P., Nielsen, B. F., Gjerde, J., Townsend, C., and Ottesen, S.: Stochastic structural modeling, *Math. Geol.*, 35, 899–914, doi:10.1023/B:MATG.0000011584.51162.69, 2003.
- 25 Hou, W., Yang, L., Deng, D., Ye, J., Clarke, K., Yang, Z., Zhuang, W., Liu, J., and Huang, J.: Assessing quality of urban underground spaces by coupling 3D geological models: The case study of Foshan city, South China, *Comput. Geosci.*, 89, 1–11, doi:10.1016/j.cageo.2015.07.016, <http://dx.doi.org/10.1016/j.cageo.2015.07.016>, 2016.
- Jeannin, P. Y., Eichenberger, U., Sinreich, M., Vouillamoz, J., Malard, a., and Weber, E.: KARSYS: A pragmatic approach to karst hydrogeological system conceptualisation. Assessment of groundwater reserves and resources in Switzerland, *Environ. Earth Sci.*, 69, 999–1013, doi:10.1007/s12665-012-1983-6, 2013.
- 30 Jessell, M. W., Ailleres, L., and de Kemp, E. A.: Towards an integrated inversion of geoscientific data: What price of geology?, *Tectonophysics*, 490, 294–306, doi:10.1016/j.tecto.2010.05.020, <http://dx.doi.org/10.1016/j.tecto.2010.05.020>, 2010.
- Julio, C., Caumon, G., and Ford, M.: Sampling the uncertainty associated with segmented normal fault interpretation using a stochastic downscaling method, *Tectonophysics*, 639, 56–67, doi:10.1016/j.tecto.2014.11.013, <http://www.sciencedirect.com/science/article/pii/S0040195114005915>, 2015.

- Kessler, H., Turner, a. K., Culshaw, M., and Royse, K.: Unlocking the potential of digital 3D geological subsurface models for geotechnical engineers, in: Eur. econference Int. Assoc. Eng. Geol., pp. 15–20, Asociacion Espanola de Geologia Aplicada a la Ingenieria, Madrid, <http://euroengeo.com/english/{%}5Cnhttp://nora.nerc.ac.uk/3817/>, 2008.
- Kinkeldey, C., Maceachren, A. M., Riveiro, M., and Schiewe, J.: Evaluating the effect of visually represented geodata uncertainty on decision-making: systematic review, lessons learned, and recommendations, *Cartogr. Geogr. Inf. Sci.*, doi:10.1080/15230406.2015.1089792, <http://dx.doi.org/10.1080/15230406.2015.1089792>, 2015.
- Klir, G. J.: *Uncertainty and Information: Foundations of Generalized Information Theory*, John Wiley & Sons, Inc., Hoboken, New Jersey, doi:10.1002/0471755575.ch3, <http://dx.doi.org/10.1002/0471755575.ch3>, 2005.
- Lajaunie, C., Courrioux, G., and Manuel, L.: Foliation fields and 3D cartography in geology: Principles of a method based on potential interpolation, *Math. Geol.*, 29, 571–584, doi:10.1007/BF02775087, 1997.
- Lark, R. M., Mathers, S. J., Thorpe, S., Arkley, S. L. B., Morgan, D. J., and Lawrence, D. J. D.: A statistical assessment of the uncertainty in a 3-D geological framework model, *Proc. Geol. Assoc.*, 124, 946–958, doi:10.1016/j.pgeola.2013.01.005, <http://dx.doi.org/10.1016/j.pgeola.2013.01.005>, 2013.
- Leung, Y., Goodchild, M. F., Lin, C. C., Leung, Y., Goodchild, M. F., and Lin, C. C.: Visualization of fuzzy scenes and probability fields, *Comput. Sci. Stat.*, 24, 416–422, 1992.
- LGRB: *Geologische Untersuchungen von Baugrundhebungen im Bereich des Erdwärmesondenfeldes beim Rathaus in der historischen Altstadt von Staufen i. Br.*, Tech. rep., Landesamt für Geologie, Rohstoffe und Bergbau (LGRB), 2010.
- LGRB: *Zweiter Sachstandsbericht zu den seit dem 01.03.2010 erfolgten Untersuchungen im Bereich des Erdwärmesondenfeldes beim Rathaus in der historischen Altstadt von Staufen i. Br.*, Tech. rep., Landesamt für Geologie, Rohstoffe und Bergbau (LGRB), 2012.
- Lindsay, M. D., Aillères, L., Jessell, M. W., de Kemp, E. A., and Betts, P. G.: Locating and quantifying geological uncertainty in three-dimensional models: Analysis of the Gippsland Basin, southeastern Australia, *Tectonophysics*, 546–547, 10–27, doi:10.1016/j.tecto.2012.04.007, <http://dx.doi.org/10.1016/j.tecto.2012.04.007>, 2012.
- Lindsay, M. D., Jessell, M. W., Ailleres, L., Perrouty, S., de Kemp, E., and Betts, P. G.: Geodiversity: Exploration of 3D geological model space, *Tectonophysics*, 594, 27–37, doi:10.1016/j.tecto.2013.03.013, <http://dx.doi.org/10.1016/j.tecto.2013.03.013>, 2013.
- Lindsay, M. D., Perrouty, S., Jessell, M., and Ailleres, L.: Inversion and Geodiversity: Searching Model Space for the Answers, *Math. Geosci.*, 46, 971–1010, doi:10.1007/s11004-014-9538-x, 2014.
- Liu, J., Tang, H., Zhang, J., and Shi, T.: Glass landslide: the 3D visualization makes study of landslide transparent and virtualized, *Environ. Earth Sci.*, 72, 3847–3856, doi:10.1007/s12665-014-3183-z, <http://link.springer.com/10.1007/s12665-014-3183-z>, 2014.
- Mallet, J. L.: Discrete Smooth Interpolation in geometric modelling, *Comput. Des.*, 24, 178–191., 1992.
- Mallet, J.-L.: Space – Time Mathematical Framework for Sedimentary Geology, *Math. Geol.*, 36, 1–32, doi:10.1023/B:MATG.0000016228.75495.7c, 2004.
- Mann, J. C.: Uncertainty in Geology, in: *Comput. Geol. - 25 Years Prog.*, edited by Davis, J. C. and Herzfeld, U. C., p. 298, Oxford University Press, Inc., New York, 1993.
- Panteleit, B. r., Jensen, S., Seiter, K., Budde, H., and McDiarmid, J.: A regional geological and groundwater flow model of Bremen (Germany): an example management tool for resource administration, *Zeitschrift der Deutschen Gesellschaft für Geowissenschaften*, 164, 569–580, doi:doi:10.1127/1860-1804/2013/0035, <http://www.ingentaconnect.com/content/schweiz/zdgg/2013/00000164/00000004/art00007>, 2013.
- Paradigm: SKUA-GOCAD™ - Paradigm® 15.5 User Guide, 2015.

- Park, H., Scheidt, C., Fenwick, D., Boucher, A., and Caers, J.: History matching and uncertainty quantification of facies models with multiple geological interpretations, *Comput. Geosci.*, 17, 609–621, doi:10.1007/s10596-013-9343-5, 2013.
- Paul, S. and Maji, P.: City block distance for identification of co-expressed microRNAs, *Mol. BioSyst.*, 10, 1509–1523, doi:10.1007/978-3-319-03756-1\_35, 2014.
- 5 R Core Team: R: A Language and Environment for Statistical Computing, R Foundation for Statistical Computing, Vienna, Austria, <https://www.R-project.org/>, 2016.
- Røe, P., Georgsen, F., and Abrahamsen, P.: An Uncertainty Model for Fault Shape and Location, *Math. Geosci.*, 1, 13, doi:10.1007/s11004-014-9536-z, <http://link.springer.com/10.1007/s11004-014-9536-z>, 2014.
- Ruch, C. and Wirsing, G.: Erkundung und Sanierungsstrategien im Erdwärmesonden-Schadensfall Staufen i. Br., *Geotechnik*, 36, 147–159, doi:10.1002/gete.201300005, <http://onlinelibrary.wiley.com/doi/10.1002/gete.201300005/abstract>, 2013.
- 10 Sawatzki, G. and Eichhorn, F., eds.: Vorl. Geol. Karte Baden-Württemberg, 1:25000, Bl. 8112 Staufen im Breisgau, Landesamtes für Geologie, Rohstoffe und Bergbau Baden-Württemberg (LGRB), Freiburg i. Br., 2. preliminary revised edn., 1999.
- Schamper, C., Jørgensen, F., Auken, E., and Effersø, F.: Case History Assessment of near-surface mapping capabilities by airborne transient electromagnetic data — An extensive comparison to conventional borehole data, *Geophysics*, 79, B187–B199, doi:10.1190/Geo2013-0256.1, 2014.
- 15 Scheidt, C. and Caers, J.: Representing spatial uncertainty using distances and kernels, *Math. Geosci.*, 41, 397–419, doi:10.1007/s11004-008-9186-0, 2009a.
- Scheidt, C. and Caers, J.: Uncertainty Quantification in Reservoir Performance Using Distances and Kernel Methods—Application to a West Africa Deepwater Turbidite Reservoir, *SPE J.*, 14, 680–692, doi:10.2118/118740-PA, <http://www.onepetro.org/doi/10.2118/118740-PA>, 2009b.
- 20 Schreiner, A.: Geologie und Landschaft, in: *Markgräflerland - Entwicklung und Nutzung einer Landschaft*, edited by Hoppe, A., 81, pp. 7–24, 6 Abb., *Berichte der Naturforschenden Gesellschaft, Freiburg i. Br.*, 1991.
- Schöttle, M., ed.: *Geotope im Regierungsbezirk Freiburg*, Landesanstalt für Umweltschutz Baden-Württemberg, Karlsruhe, 2005.
- Shannon, C. E.: A mathematical theory of communication, *Bell Syst. Tech. J.*, 27, 379–423, doi:10.1145/584091.584093, <http://cm.bell-labs.com/cm/ms/what/shannonday/shannon1948.pdf>, 1948.
- 25 Suzuki, S., Caumon, G., and Caers, J.: Dynamic data integration for structural modeling: Model screening approach using a distance-based model parameterization, *Comput. Geosci.*, 12, 105–119, doi:10.1007/s10596-007-9063-9, 2008.
- Tacher, L., Pomian-Szednicki, I., and Parriaux, a.: Geological uncertainties associated with 3-D subsurface models, *Comput. Geosci.*, 32, 212–221, doi:10.1016/j.cageo.2005.06.010, 2006.
- 30 Tertois, A.-L. and Mallet, J.-L.: Editing Faults within tetrahedral volume models in real time, in: *Structurally Complex Reservoirs*, edited by Jolley, S. J., Barr, D., Walsh, J. J., and Knipe, R. J., vol. 292 of *Geol. Society Spec. Publ.*, pp. 89–101, doi:10.1144/sp292.5, 2007.
- Thiele, S. T., Jessell, M. W., Lindsay, M., Ogarko, V., Wellmann, J. F., and Pakyuz-Charrier, E.: The topology of geology 1: Topological analysis, *J. Struct. Geol.*, 91, 27–38, doi:10.1016/j.jsg.2016.08.009, <http://dx.doi.org/10.1016/j.jsg.2016.08.009>, 2016a.
- Thiele, S. T., Jessell, M. W., Lindsay, M., Wellmann, J. F., and Pakyuz-Charrier, E.: The topology of geology 2: Topological uncertainty, *J. Struct. Geol.*, 91, 74–87, doi:10.1016/j.jsg.2016.08.010, <http://dx.doi.org/10.1016/j.jsg.2016.08.010>, 2016b.
- 35 Webb, A. R. and Copesey, K. D.: Measures of dissimilarity, in: *Stat. Pattern Recognit.*, chap. A1, pp. 419–429, John Wiley & Sons, Ltd, Chichester, UK, second edn., 2003.

- Wellmann, J. F.: Information theory for correlation analysis and estimation of uncertainty reduction in maps and models, *Entropy*, 15, 1464–1485, doi:10.3390/e15041464, <http://www.mdpi.com/1099-4300/15/4/1464/>, 2013.
- Wellmann, J. F. and Regenauer-Lieb, K.: Uncertainties have a meaning: Information entropy as a quality measure for 3-D geological models, *Tectonophysics*, 526–529, 207–216, doi:10.1016/j.tecto.2011.05.001, <http://dx.doi.org/10.1016/j.tecto.2011.05.001>, 2012.
- 5 Wellmann, J. F., Horowitz, F. G., Schill, E., and Regenauer-Lieb, K.: Towards incorporating uncertainty of structural data in 3D geological inversion, *Tectonophysics*, 490, 141–151, doi:10.1016/j.tecto.2010.04.022, <http://dx.doi.org/10.1016/j.tecto.2010.04.022>, 2010.
- Yager, R. R.: Measures of entropy and fuzziness related to aggregation operators, *Inf. Sci. (Ny)*, 82, 147–166, doi:10.1016/0020-0255(94)00030-F, 1995.
- Yamamoto, J. K., Koike, K., Kikuda, A. T., Campanha, G. A. D. C., and Endlen, A.: Post-processing for uncertainty reduction in computed 3D geological models, *Tectonophysics*, 633, 232–245, doi:10.1016/j.tecto.2014.07.013, <http://linkinghub.elsevier.com/retrieve/pii/S004019511400393X>, 2014.
- 10 Zadeh, L.: Fuzzy sets, *Inf. Control*, 8, 338–353, doi:10.1016/S0019-9958(65)90241-X, <http://linkinghub.elsevier.com/retrieve/pii/S001999586590241X>, 1965.

The Structural Uncertainty workflow of SKUA requires a set of parameters and input modes to be defined by the modeler.

For each fault, three different input modes were available: 1) constant symmetry, 2) move with others (MWO) and 3) fixed. A maximum displacement and probability distribution was assigned when available for the input mode. Minor faults and those indirectly constrained by surrounding faults or boreholes were set to move with others. All other faults were set to constant symmetry. Maximum displacement values are either averaged by combining multiple sources (gk1, gk4, tec3) or by an educated guess by the authors. To allow for a realistic distribution of realizations around our average estimate we chose a Gaussian distribution in all cases. A summary of all used fault parameter settings is shown in Table S1.

**Table S1:** Fault parameter settings used in the Structural Uncertainty Workflow of SKUA.

| Fault | Input Mode        | Maximum Displacement [m] | Distribution | Model   |
|-------|-------------------|--------------------------|--------------|---------|
| gk1   | constant symmetry | 45                       | Gaussian     | 1,2,3,4 |
| gk3   | MWO               | NA                       | NA           | 1,2,3,4 |
| gk4   | constant symmetry | 70                       | Gaussian     | 1,2,3,4 |
| tec3  | constant symmetry | 10                       | Gaussian     | 1,2,3,4 |
| KP1   | MWO               | NA                       | NA           | 1,2,3,4 |
| StrnA | MWO               | NA                       | NA           | 3,4     |
| StrnE | constant symmetry | 10                       | Gaussian     | 3,4     |
| Strn1 | MWO               | NA                       | NA           | 4       |
| Strn2 | constant symmetry | 10                       | Gaussian     | 4       |
| Strn3 | constant symmetry | 5                        | Gaussian     | 4       |
| Strn4 | MWO               | NA                       | NA           | 4       |
| Strn6 | constant symmetry | 10                       | Gaussian     | 4       |
| Strn7 | constant symmetry | 5                        | Gaussian     | 4       |
| Strn8 | constant symmetry | 5                        | Gaussian     | 4       |

NA = not applicable; MWO = move with others

In addition to the three above mentioned input modes, a forth setting "existing surface" is available to model the uncertainty of horizons. The existing surface input mode uses an alternative surface interpretation to constrain model realizations. We constructed alternative surface interpretations that reflect a maximum deviation in dip and azimuth of  $\pm 5^\circ$  from the original horizon surfaces. Horizons for perturbation were chosen based on the premises that a continuous representative horizon surface, build from input data during explicit modeling (Figure 4) was available across all fault blocks. For Model 4, an alternative surface interpretation was possible only for unit ku, because the domain was strongly fragmented after adding the seismic data; and no other unit could be represented continuously across all fault blocks. Furthermore, perturbations applied to an initial surface were spatially cor-



**Table S2:** Variogram parameter settings used in the Structural Uncertainty Workflow of SKUA.

| Variable      | Value  | Value   | Variable |
|---------------|--------|---------|----------|
| R1 (max)      | 1000 m | Azimuth | 305 °    |
| R2 (max)      | 1000 m | Dip     | 140 °    |
| R3 (vertical) | 200 m  | Plunge  | 0 °      |

related using a variogram with the same parameter values for all four models (Table S2).

Maximum displacement was determined based on the unit thickness information (Figure 3) and constraints from wells. The applied settings reflect an overall possible displacement of 30 m across all horizons, while avoiding unrealistic thickness perturbations of the relatively narrow ku unit by applying constraints on its upper and lower boundary surfaces (MWO or existing surface). All horizon parameter settings are summarized in Table S3.

**Table S3:** Horizon parameter settings used in the Structural Uncertainty Workflow of SKUA.

| Unit  | Input Mode        | Maximum Displacement [m] | Honor Well | Model   |
|-------|-------------------|--------------------------|------------|---------|
| DTM   | fixed             | NA                       | NA         | 1,2,3,4 |
| j     | MWO               | NA                       | Yes        | 1,2,3,4 |
| km3   | constant symmetry | 30                       | NA         | 1,2,3,4 |
| km2   | existing surface  | surface                  | Yes        | 1       |
| km2   | MWO               | NA                       | Yes        | 2,3,4   |
| km1   | existing surface  | surface                  | Yes        | 1,2,3   |
| km1   | MWO               | NA                       | Yes        | 4       |
| ku    | constant symmetry | 30                       | Na         | 1       |
| ku    | existing surface  | surface                  | Yes        | 2,3,4   |
| mo    | MWO               | NA                       | NA         | 1,2     |
| mo    | MWO               | NA                       | Yes        | 3,4     |
| mm.mu | constant symmetry | 30                       | NA         | 1,2,3,4 |
| so    | constant symmetry | 30                       | NA         | 1,2,3,4 |
| base  | constant symmetry | 30                       | NA         | 1,2,3,4 |

NA = not applicable; MWO = move with others
